# Supplementary material
Source: Royal Society of Chemistry journal article supplement (doi:10.1039/d6gc00524a)
Supplement: d6gc00524a1.pdf [file d6gc00524a1.pdf]

## Supplementary Materials

### **Defect-engineered Ru-Co/TiO<sub>2-x</sub> catalysts for highly efficient plasma-catalytic ammonia synthesis at ambient conditions**

Bianbian Gao <sup>a,b</sup>, Yutong Feng <sup>a,b</sup>, Chunyu Li <sup>a</sup>, Jiantao Zhao <sup>a</sup>, Yitian Fang <sup>a</sup>,  
Guoqiang Cao <sup>a,\*</sup>

<sup>a</sup> State Key Laboratory of Coal Conversion, Institute of Coal Chemistry, Chinese Academy of Sciences, Taiyuan 030001, China

<sup>b</sup> University of Chinese Academy of Sciences, Beijing 100049, China

\*Corresponding author: caoguoqiang@sxicc.ac.cn

## 1. Experimental details

The DBD reactor employs a quartz tube (inner diameter 20 mm, outer diameter 24 mm) as the dielectric barrier layer, around whose outer wall a meshed stainless-steel wire serving as the grounding electrode is wound, with an effective discharge length of 150 mm. Inner quartz electrode rods (outer diameter 14 mm) are placed along the axis of the quartz tube as high-voltage electrodes, with a discharge gap of 3 mm. A sinusoidal high-voltage power supply (Suman, CTP-2000KP) was used to apply voltage, generating discharge plasma within the quartz tube. The working frequency was approximately 9.6 kHz. After capacitive voltage division (ratio 1:1000), the voltage at both ends of the reactor was measured using an inductive voltage probe (Tektronix, TPP0201). All electrical signals were collected by a dual-channel digital oscilloscope (Tektronix, TBS1102C). The discharge power was calculated by integrating the area of the Q-U Lissajous figure. To reduce digital image noise, the electrical signals required for drawing the Lissajous figure were processed through three averaging samplings. The exhaust gas after the reaction enters the chemical absorption device to capture the generated  $\text{NH}_3$ .

Typically, 100 mg catalysts were fixed in the gap between the high voltage electrode and the quartz tube.  $\text{N}_2$  and  $\text{H}_2$  were transported to the packed DBD plasma reactor in a certain proportion. Under the synergistic action of the catalyst, energy was input into the reaction system through alternating current power supply to conduct the ammonia synthesis reactions. The configured  $0.005 \text{ mol}\cdot\text{L}^{-1}$  dilute  $\text{H}_2\text{SO}_4$  solution absorption device was used to absorb and detect the  $\text{NH}_3$ .

## 2. Supporting Figures and Tables

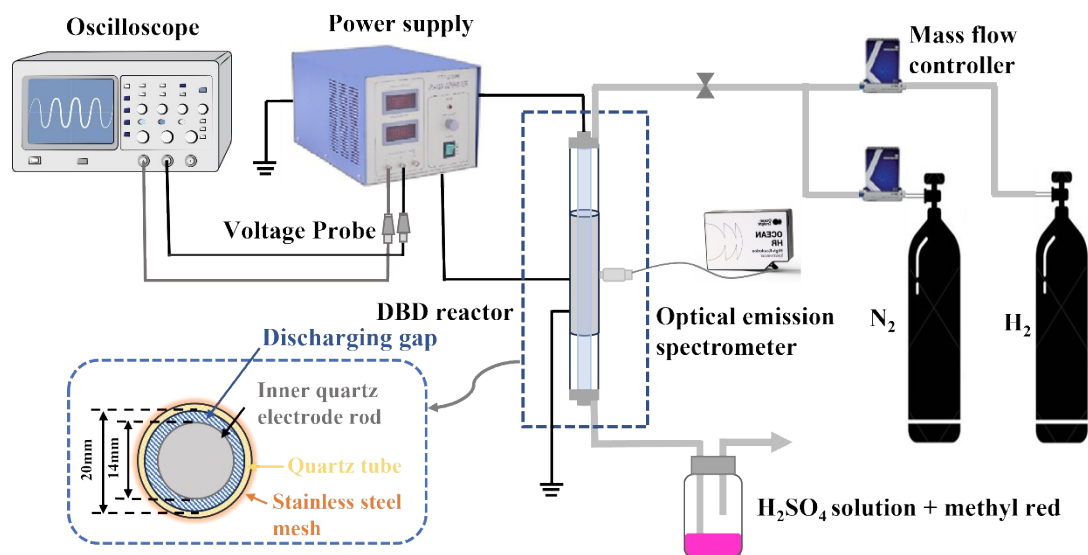

Fig. S1 Schematic diagram of the plasma-catalytic  $\text{NH}_3$  synthesis reaction system.

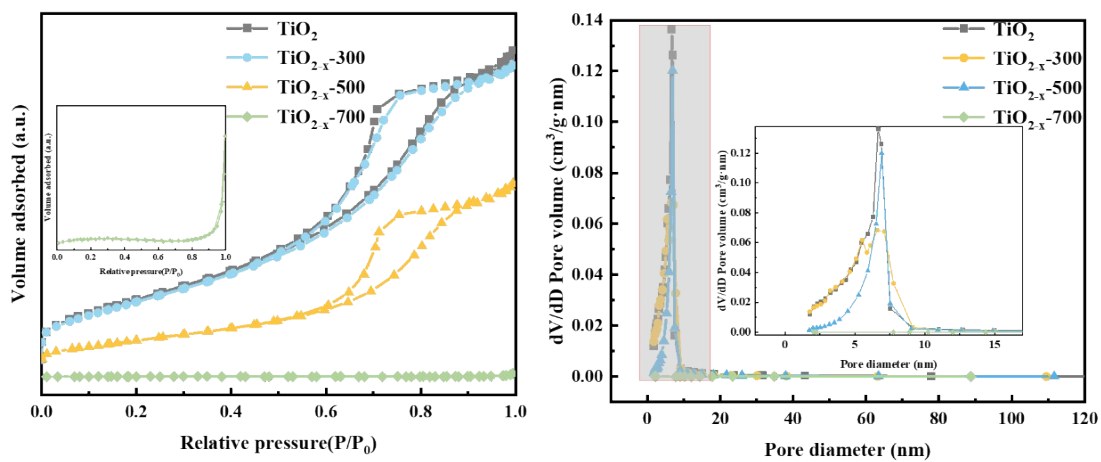

Fig. S2 (a)  $\text{N}_2$  adsorption-desorption isotherms, (b) Pore size distribution curves of  $\text{TiO}_{2-x-z}$  supports.

**Table S1** Physical properties of TiO<sub>2-x</sub>-z supports and Ru-Co/TiO<sub>2-x</sub>-z catalysts.

| Samples                       | Specific surface area (m <sup>2</sup> ·g <sup>-1</sup> ) | Pore volume (cm <sup>3</sup> ·g <sup>-1</sup> ) | Average pore size (nm) | Anatase (%) <sup>a</sup> |
|-------------------------------|----------------------------------------------------------|-------------------------------------------------|------------------------|--------------------------|
| TiO <sub>2</sub>              | 175.99                                                   | 0.318                                           | 5.48                   | 87.1                     |
| TiO <sub>2-x</sub> -300       | 171.71                                                   | 0.303                                           | 5.31                   | 86.3                     |
| TiO <sub>2-x</sub> -500       | 81.92                                                    | 0.187                                           | 6.63                   | 89.7                     |
| TiO <sub>2-x</sub> -700       | 0.68                                                     | 0.003                                           | 38.86                  | 1.2                      |
| Ru-Co/TiO <sub>2</sub>        | 22.87                                                    | 0.162                                           | 23.37                  | 19.5                     |
| Ru-Co/TiO <sub>2-x</sub> -300 | 20.24                                                    | 0.164                                           | 27.40                  | 19.1                     |
| Ru-Co/TiO <sub>2-x</sub> -500 | 29.47                                                    | 0.126                                           | 13.24                  | 73.9                     |
| Ru-Co/TiO <sub>2-x</sub> -700 | 4.27                                                     | 0.033                                           | 30.19                  | 1.7                      |

<sup>a</sup> Anatase(%) was calculated by XRD:

$$\text{Anatase}\% = \frac{I_{\text{anatase}(101)}}{(I_{\text{anatase}(101)} + 1.4I_{\text{rutile}(110)})} * 100.$$

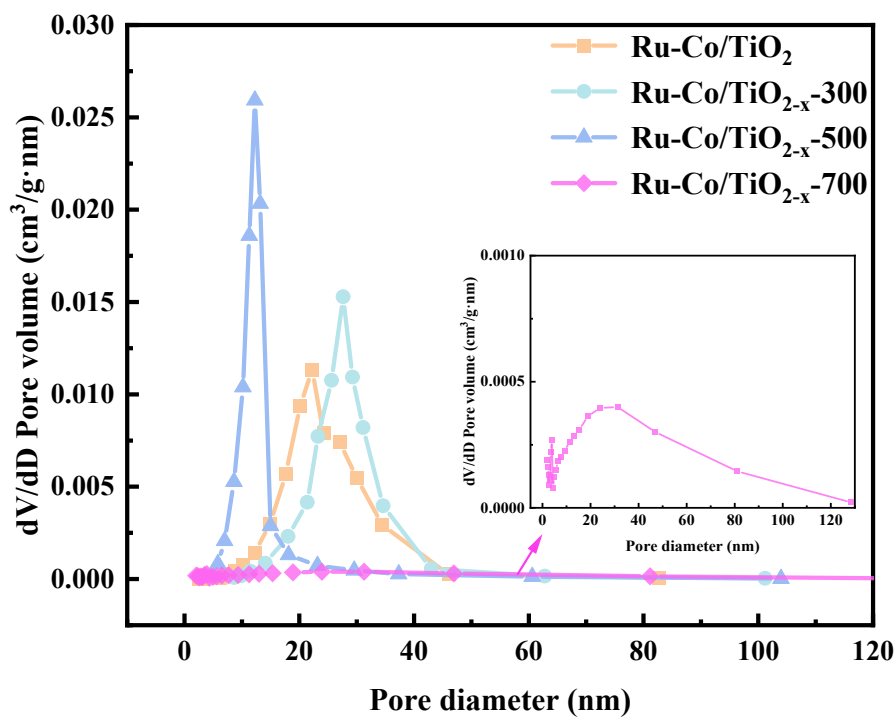**Fig. S3** Pore size distribution curves of Ru-Co/TiO<sub>2-x</sub>-z catalysts.

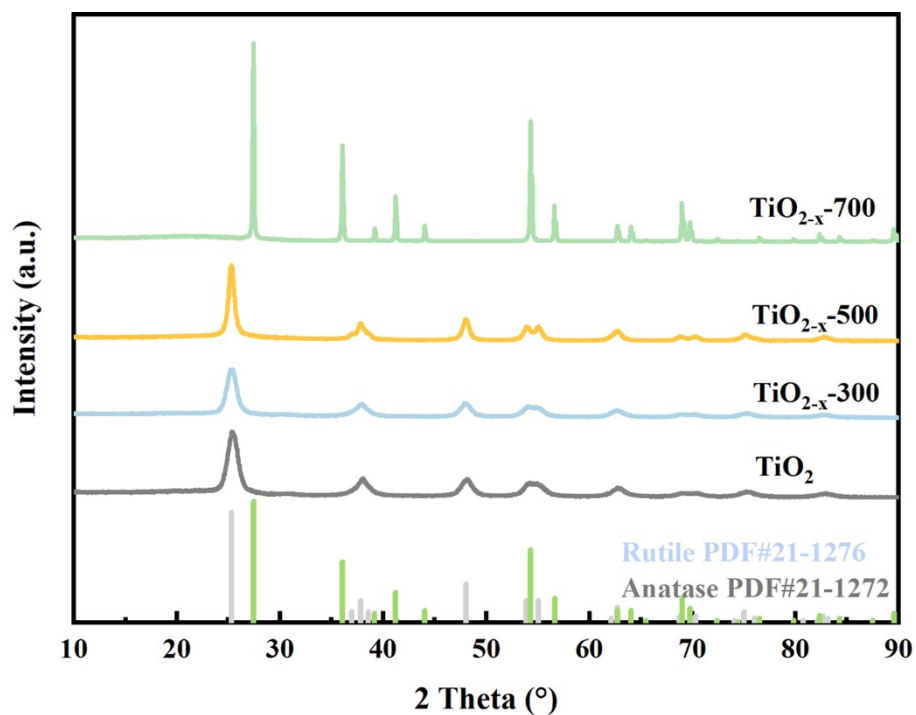

**Fig. S4** XRD pattern of TiO<sub>2-x-z</sub> supports.

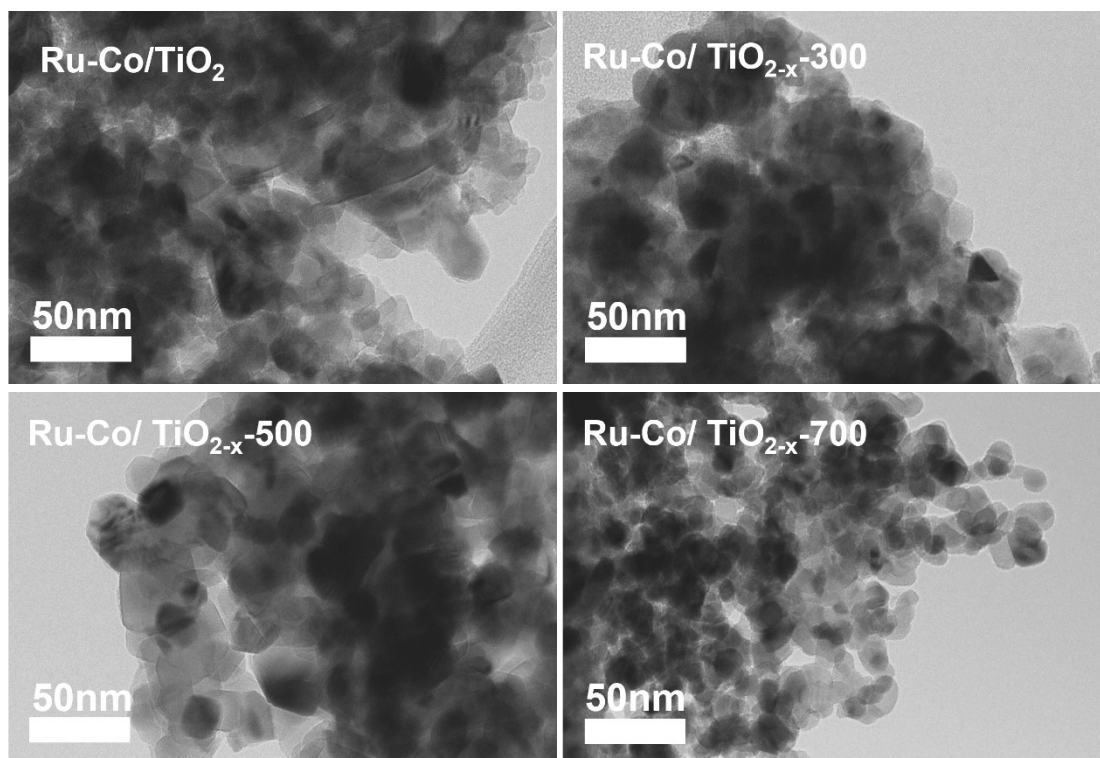

**Fig. S5** HRTEM images of Ru-Co/TiO<sub>2-x-z</sub> catalysts.

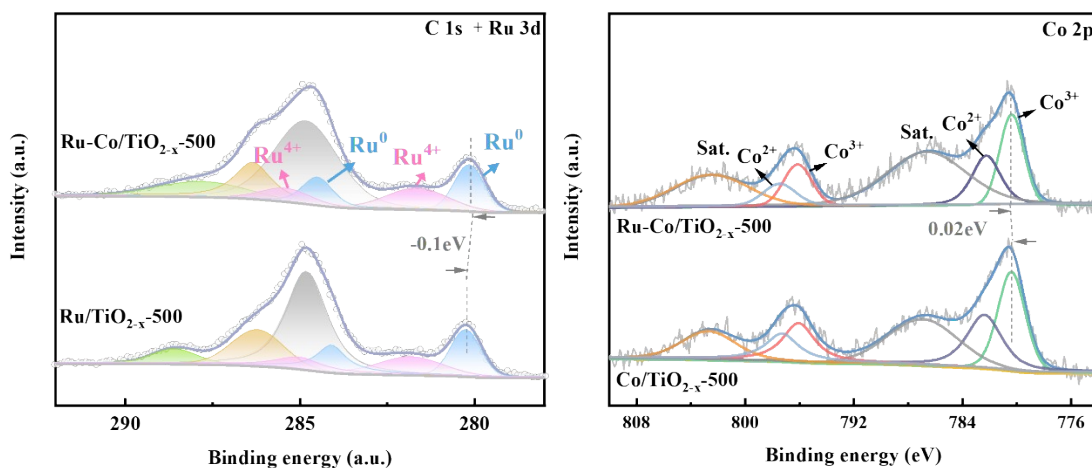

**Fig. S6** XPS spectra comparison of (a) Ru 3d spectra for Ru/TiO<sub>2-x</sub>-500 and Ru-Co/TiO<sub>2-x</sub>-500 catalysts, (b) and Co 2p spectra for Co/TiO<sub>2-x</sub>-500 and Ru-Co/TiO<sub>2-x</sub>-500 catalysts.

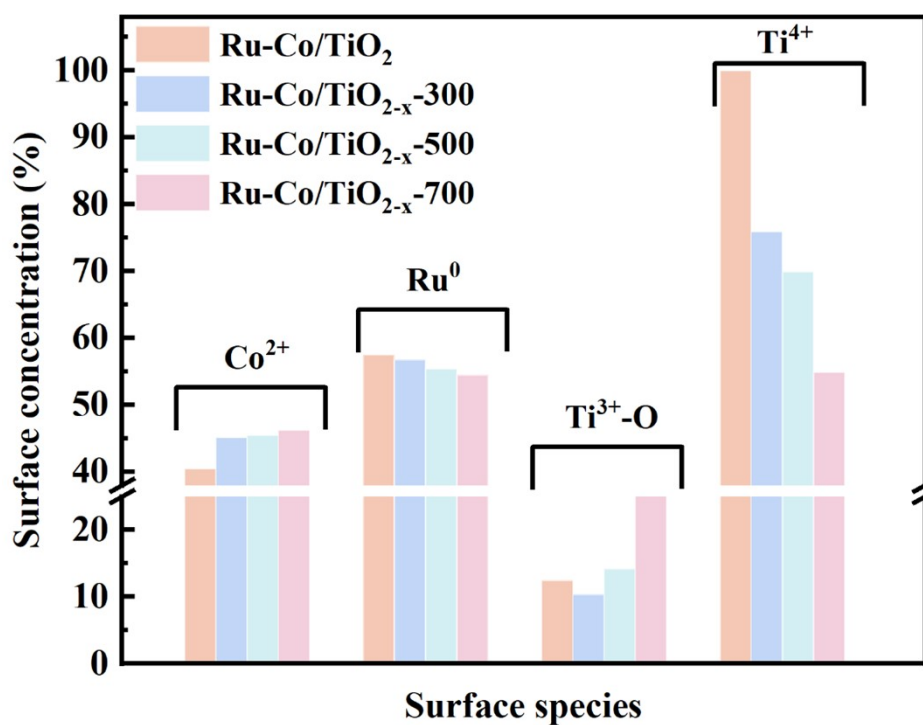

**Fig. S7** Concentrations of Ru<sup>0</sup>, Co<sup>2+</sup>, oxygen species (Ti<sup>3+</sup>-O) and Ti<sup>4+</sup> on the catalyst surface based on the Ru 3d, Co 2p, O 1s and Ti 2p XPS spectra of Ru-Co/TiO<sub>2-x-z</sub> catalysts.

**Table S2** Quantitative Analysis of Co 2p, Ru 3d, O 1s, and Ti 2p Orbitals of Ru/TiO<sub>2-x</sub>-500, Co/TiO<sub>2-x</sub>-500 and Ru-Co/TiO<sub>2-x</sub>-z Catalysts.

| Catalysts                     | Co species(%)              |                  | Ru species(%)   |                  | Oxygen species(%) |                     |                     | Ti species(%)    |                  |
|-------------------------------|----------------------------|------------------|-----------------|------------------|-------------------|---------------------|---------------------|------------------|------------------|
|                               | Co <sup>2+</sup>           | Co <sup>3+</sup> | Ru <sup>0</sup> | Ru <sup>4+</sup> | Ti-OH             | Ti <sup>3+</sup> -O | Ti <sup>4+</sup> -O | Ti <sup>4+</sup> | Ti <sup>3+</sup> |
|                               | Ru/TiO <sub>2-x</sub> -500 | -                | -               | 54.5             | 45.4              | 5.4                 | 8.8                 | 86.5             | -                |
| Co/TiO <sub>2-x</sub> -500    | 44.3                       | 55.7             | -               | -                | 8.8               | 13.4                | 76.7                | -                | -                |
| Ru-Co/TiO <sub>2</sub>        | 40.5                       | 59.5             | 53.2            | 46.8             | 24.8              | 10.4                | 64.8                | 100              | -                |
| Ru-Co/TiO <sub>2-x</sub> -300 | 45.1                       | 54.9             | 53.3            | 46.7             | 11.8              | 11.2                | 77.0                | 75.9             | 24.1             |
| Ru-Co/TiO <sub>2-x</sub> -500 | 45.5                       | 54.5             | 55.2            | 44.8             | 12.5              | 13.4                | 74.1                | 69.9             | 30.1             |
| Ru-Co/TiO <sub>2-x</sub> -700 | 46.2                       | 53.8             | 56.3            | 43.7             | 22.4              | 30.9                | 46.6                | 53.3             | 34.6             |

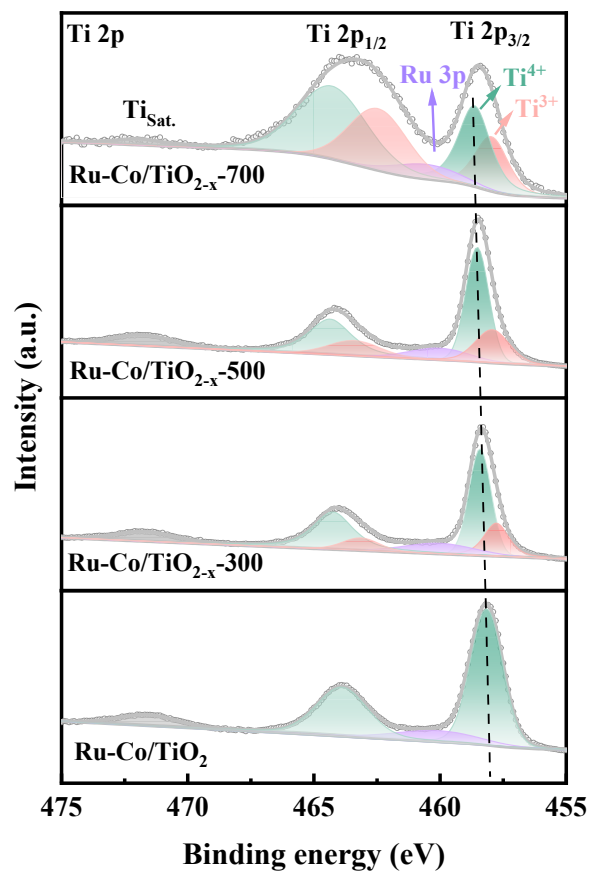

Fig. S8 Ti 2p XPS spectra of Ru-Co/TiO<sub>2-x-z</sub> catalysts.

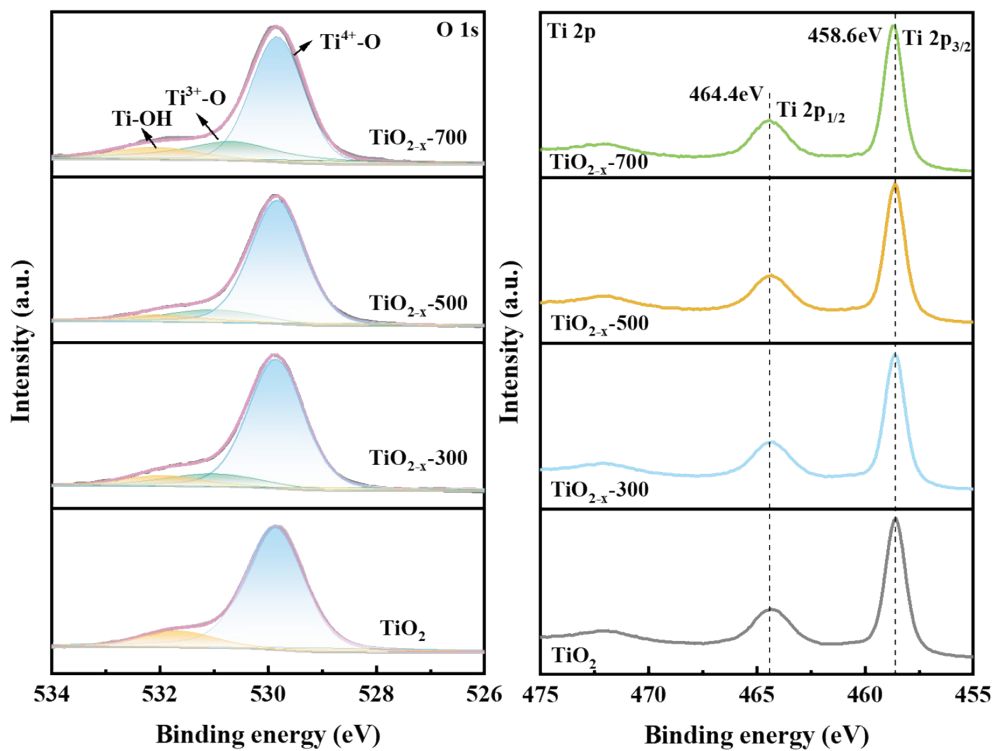

Fig. S9 XPS spectra of TiO<sub>2-x-z</sub> (a) O 1s (b) Ti 2p.

**Table S3** Quantitative Analysis of O 1s Orbitals of TiO<sub>2-x-z</sub> samples.

| Samples                 | Ti-OH | Ti <sup>3+</sup> -O | Ti <sup>4+</sup> -O |
|-------------------------|-------|---------------------|---------------------|
| TiO <sub>2</sub>        | 11.3% | -                   | 88.7%               |
| TiO <sub>2-x</sub> -300 | 6.8%  | 10.6%               | 82.6%               |
| TiO <sub>2-x</sub> -500 | 5.9%  | 11.3%               | 82.8%               |
| TiO <sub>2-x</sub> -700 | 9.2%  | 24.2%               | 66.6%               |

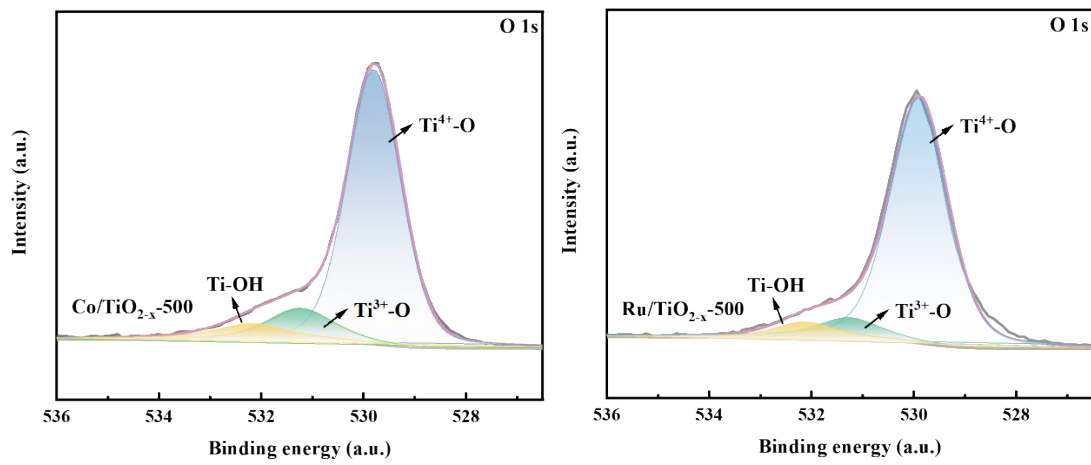**Fig. S10** High-resolution XPS peaks of O 1s spectra for (a) Co/TiO<sub>2-x</sub>-500, and (b) Ru/TiO<sub>2-x</sub>-500 catalysts.**Table S4** The surface basicity of Ru-Co/TiO<sub>2-x-z</sub> catalysts.

| Samples                       | CO <sub>2</sub> desorption (mmol·g <sup>-1</sup> ) |
|-------------------------------|----------------------------------------------------|
| Ru-Co/TiO <sub>2</sub>        | 0.521                                              |
| Ru-Co/TiO <sub>2-x</sub> -300 | 0.439                                              |
| Ru-Co/TiO <sub>2-x</sub> -500 | 0.488                                              |
| Ru-Co/TiO <sub>2-x</sub> -700 | 0.302                                              |

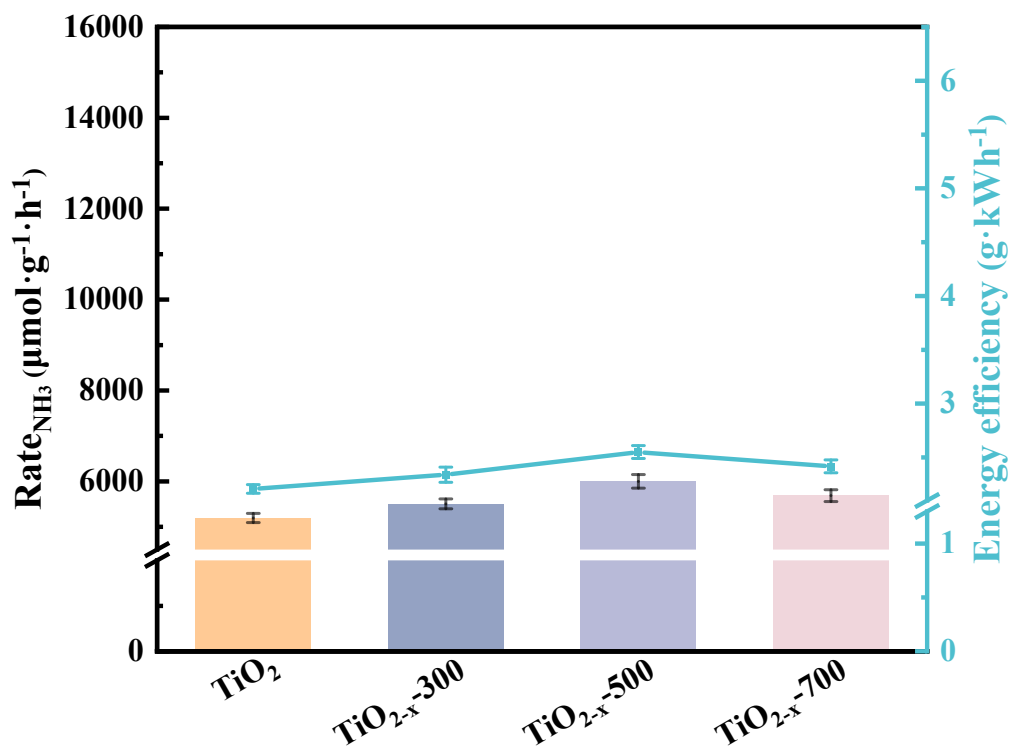

Fig. S11 NH<sub>3</sub> synthesis rate and energy efficiency over pure TiO<sub>2-x-z</sub> supports.

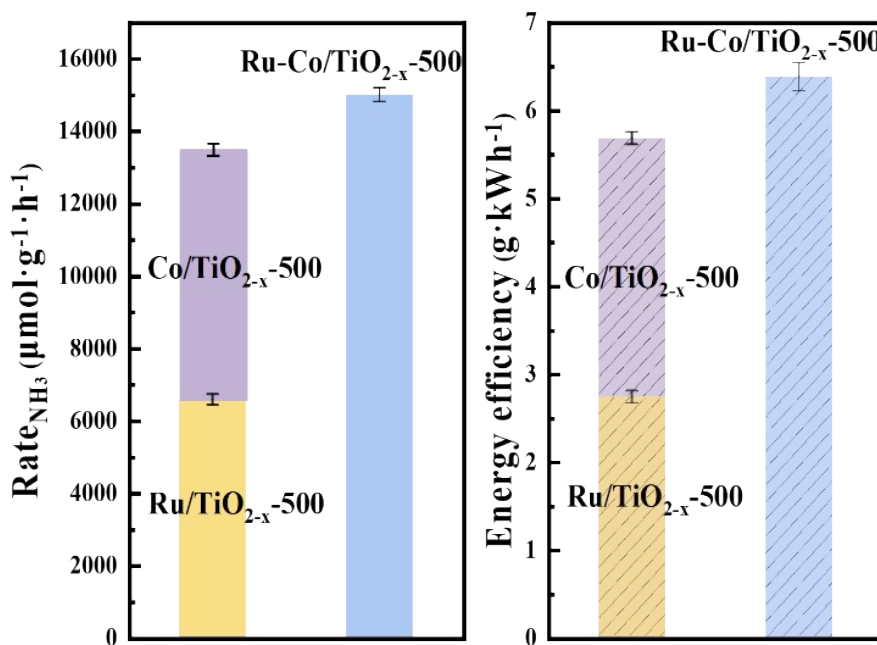

Fig. S12 NH<sub>3</sub> synthesis rate and energy efficiency over Ru/TiO<sub>2-x-500</sub> and Co/TiO<sub>2-x-500</sub> catalysts.

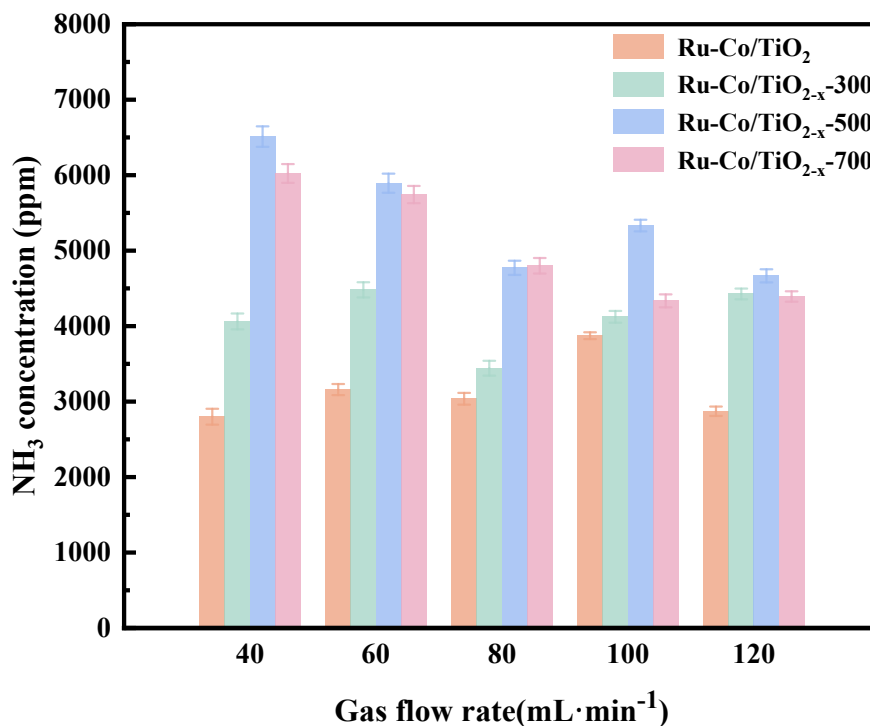

**Fig. S13** NH<sub>3</sub> concentration over Ru-Co/TiO<sub>2-x</sub>-z catalysts at various total gas flow rates.

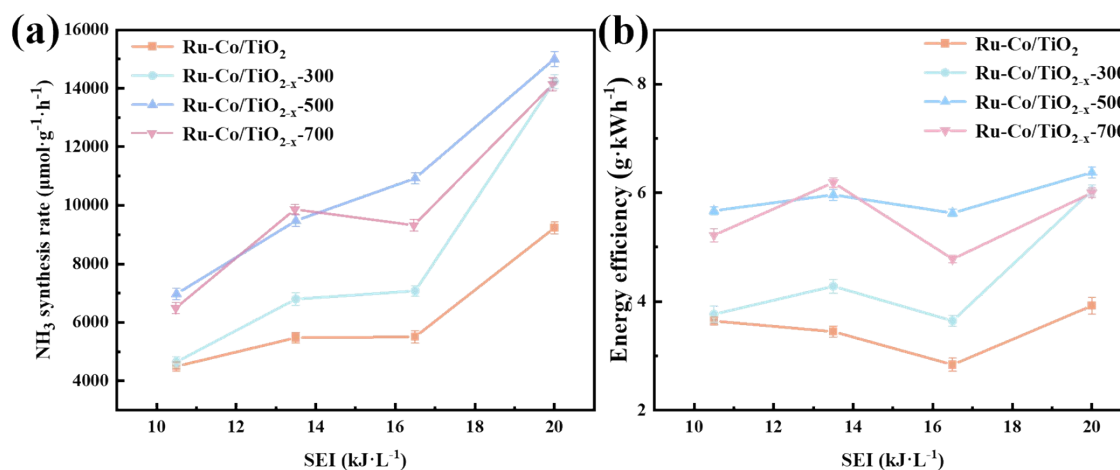

**Fig. S14** (a) NH<sub>3</sub> synthesis rate and (b) Energy efficiency over Ru-Co/TiO<sub>2-x</sub>-z catalysts at various SEI (at a fixed flow rate of 120 mL·min<sup>-1</sup>).

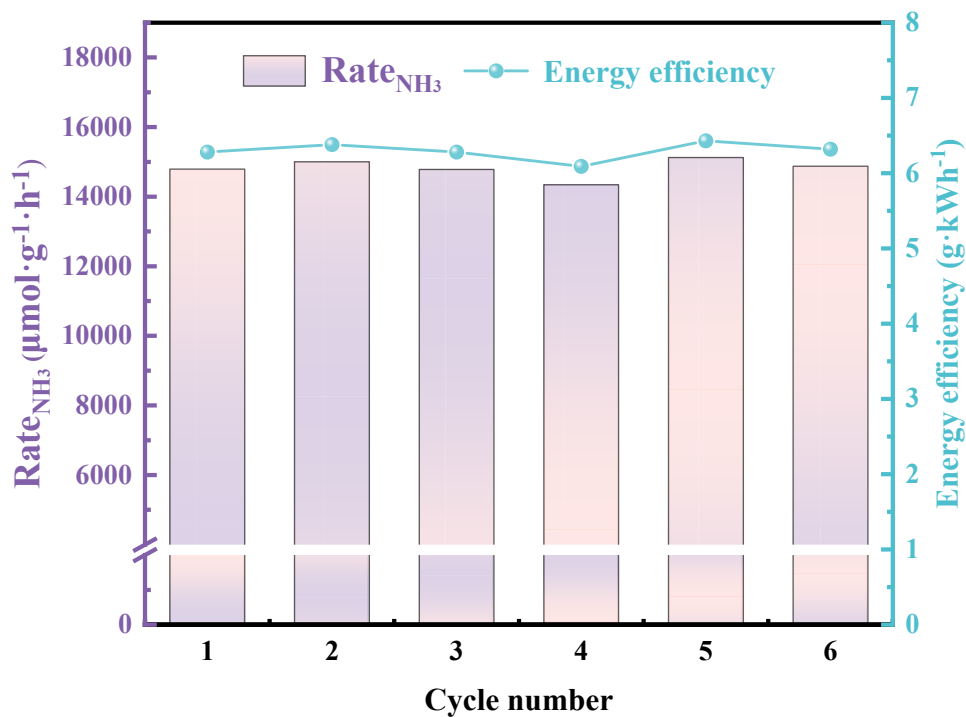

**Fig. S15** The stability tests of Ru-Co/TiO<sub>2-x</sub>-500 catalysts for 6 cycles.

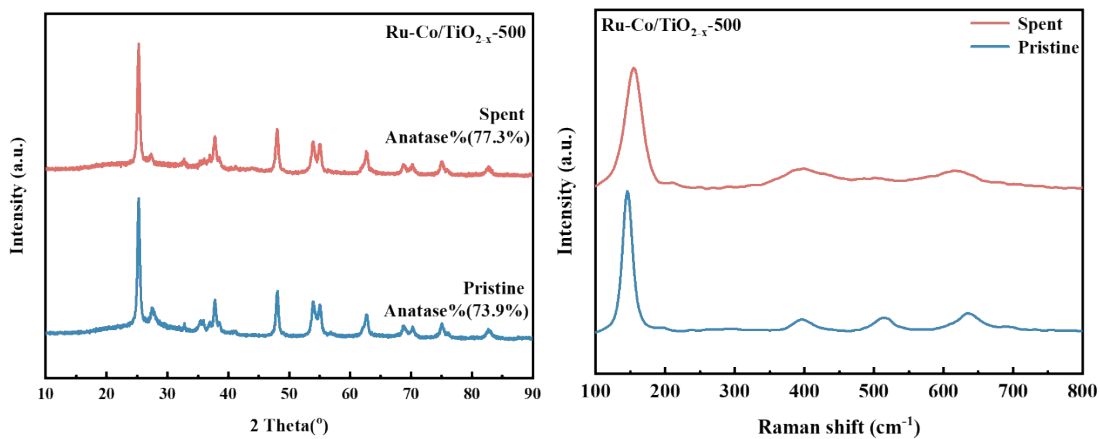

**Fig. S16** (a) XRD pattern of pristine and spent Ru-Co/TiO<sub>2-x</sub>-500 catalysts. (b) Raman spectra of pristine and spent Ru-Co/TiO<sub>2-x</sub>-500 catalysts.

**Table S5** Performance comparison of recently reported plasma-catalytic ammonia synthesis catalysts in DBD reactors at atmospheric pressure.

| Catalysts                                                   | Discharge parameters |             |                | Reaction conditions              |                                             |             | SEI<br>(kJ·L <sup>-1</sup> ) | Rate <sub>NH<sub>3</sub></sub><br>(μmol·g <sup>-1</sup> ·h <sup>-1</sup> ) | EE<br>(g <sub>NH<sub>3</sub></sub> ·kWh <sup>-1</sup> ) |
|-------------------------------------------------------------|----------------------|-------------|----------------|----------------------------------|---------------------------------------------|-------------|------------------------------|----------------------------------------------------------------------------|---------------------------------------------------------|
|                                                             | f<br>(kHz)           | U<br>(kV)   | P<br>(W)       | N <sub>2</sub> /H <sub>2</sub>   | Q <sub>gas</sub><br>(mL·min <sup>-1</sup> ) | T<br>(°C)   |                              |                                                                            |                                                         |
| <b>SBA-15</b> <sup>1</sup>                                  | 8.0                  | 7.5-<br>9.5 |                | 1:1                              | 20                                          | -           | -                            | 5337                                                                       | 1.04                                                    |
| <b>VN</b> <sup>2</sup>                                      | 10                   | -           | (Input)<br>100 | 2:3                              | 100                                         | 100         | -                            | 8423                                                                       | 1.43                                                    |
| <b>Co/BCN</b> <sup>3</sup>                                  | -                    | -           | -              | 1:3                              | 40                                          | 75          | -                            | 2478                                                                       | 2.09                                                    |
| <b>Co/SiO<sub>2</sub></b> <sup>4</sup>                      |                      |             | 2              | N <sub>2</sub> +H <sub>2</sub> O | 6.2                                         | 122-<br>144 | 19                           | 3700                                                                       | 3.20                                                    |
| <b>Co SACs</b> <sup>5</sup>                                 | -                    | -           | 59             | 2:3                              | 25                                          | -           | 142                          | 10647                                                                      | 0.31                                                    |
| <b>Co-Ni/MOF-74</b> <sup>6</sup>                            | -                    | -           | 35             | 1:1                              | 200                                         | -           | 11                           | 2609                                                                       | 0.72                                                    |
| <b>Ru/α-Al<sub>2</sub>O<sub>3</sub></b> <sup>7</sup>        | -                    | -           | 38             | 2:1                              | 120                                         | -           | 19                           | 1186                                                                       | 1.89                                                    |
| <b>Ru/Al<sub>2</sub>O<sub>3</sub> membrane</b> <sup>8</sup> | 21.5                 | -           | 127            | 1:3                              | 30                                          | -           | 254                          | 960                                                                        | 0.37                                                    |
| <b>Ru/LDH-P</b> <sup>9</sup>                                | 8.1                  | 12          | 13             | 1:1                              | 20                                          | -           | 39                           | 4500                                                                       | 1.70                                                    |
| <b>Ru-Mg/Al<sub>2</sub>O<sub>3</sub></b> <sup>10</sup>      |                      |             | 1200           | 4:1                              | 2000                                        | 300         | 36                           | 565                                                                        | 35.70                                                   |
| <b>Ru-Co/AC</b> <sup>11</sup>                               | -                    | -           | 40             | 1:1                              | 120                                         | -           | 20                           | 7547                                                                       | 3.21                                                    |
| <b>Ru-Co/TiO<sub>2-x</sub>-500</b><br>(This work)           | -                    | -           | 40             | 1:1                              | 120                                         | -           | 20                           | 15000                                                                      | 6.38                                                    |

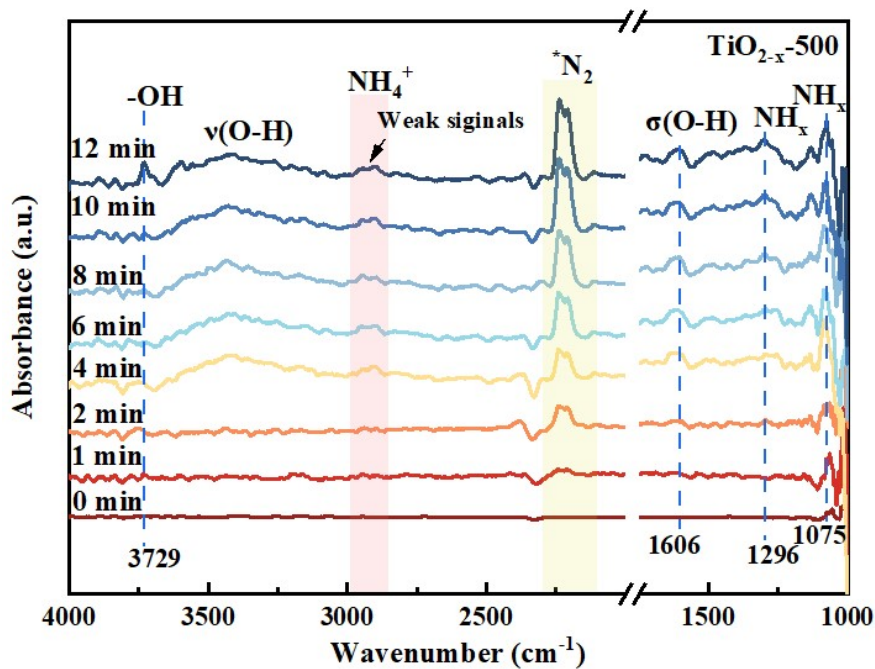

**Fig. S17** In-situ DRIFTS spectra of plasma-catalytic  $\text{NH}_3$  synthesis over pure  $\text{TiO}_{2-x}$ -500 support.

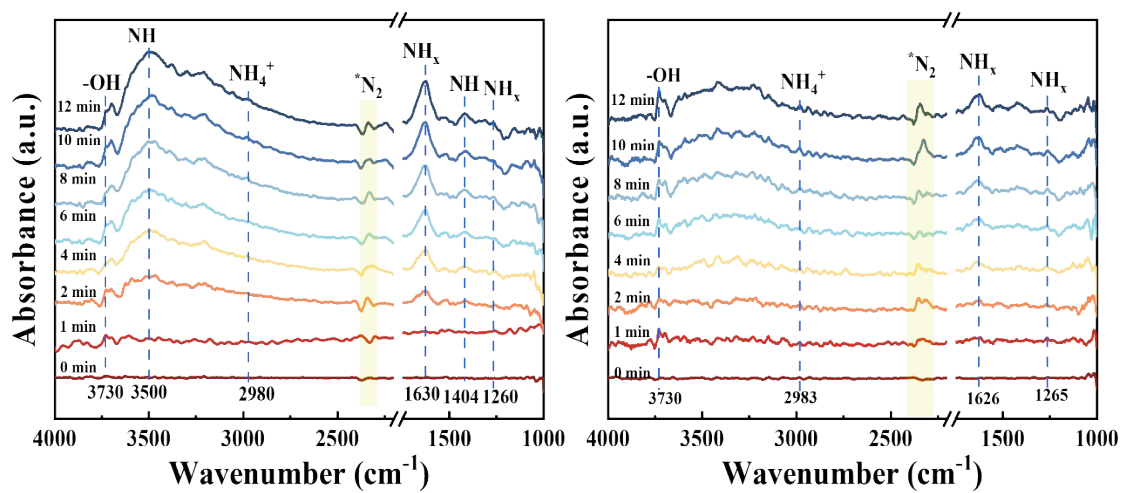

**Fig. S18** In-situ DRIFTS spectra of plasma-catalytic  $\text{NH}_3$  synthesis over (a)  $\text{Co}/\text{TiO}_{2-x}$ -500 (b) and  $\text{Ru}/\text{TiO}_{2-x}$ -500 catalysts.

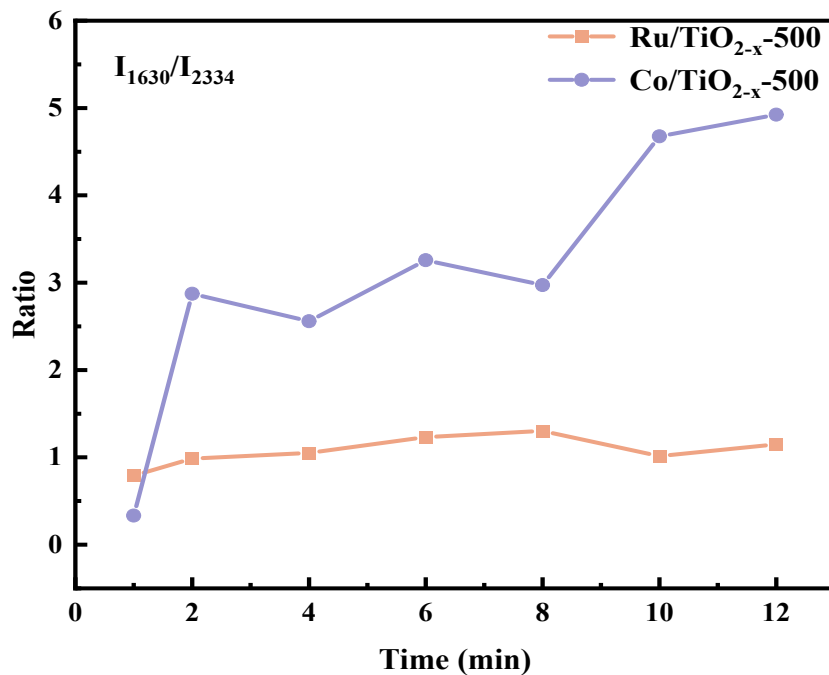

**Fig. S19** The characteristic peak intensity ratios ( $1630\text{ cm}^{-1}/2334\text{ cm}^{-1}$ ,  $^*\text{NH}_x/^*\text{N}_2$ ) of intermediate species during plasma-catalytic ammonia synthesis over Ru/TiO<sub>2-x</sub>-500 and Co/TiO<sub>2-x</sub>-500 catalysts.

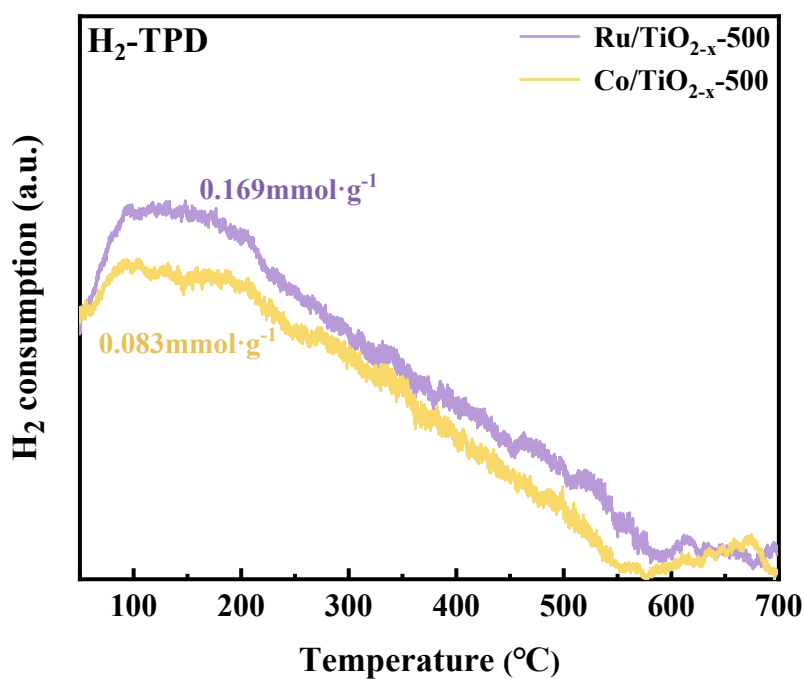

**Fig. S20** H<sub>2</sub>-TPD profiles of Ru/TiO<sub>2-x</sub>-500 and Co/TiO<sub>2-x</sub>-500.

**Table S6.** Summary of vibrational peak assignments for adsorbed species on catalyst surfaces.

| Absorbed specie                               | Vibrational peak (cm <sup>-1</sup> ) | Assignment                               | Literature value                                    |
|-----------------------------------------------|--------------------------------------|------------------------------------------|-----------------------------------------------------|
| NH <sub>4</sub> <sup>+</sup> /NH <sub>3</sub> | 2980, 2896                           | NH <sub>4</sub> <sup>+</sup>             | 2980, 2890 <sup>1213</sup> , 2894 <sup>14</sup>     |
|                                               | 1055                                 | N-H                                      | 1056 <sup>14</sup>                                  |
|                                               | 1400, 1404                           | NH deformation                           | 1392 <sup>14</sup> , 1427, 1414, 1440 <sup>15</sup> |
| NH <sub>x</sub>                               | 1238, 1296                           | H-N-H bending of NH <sub>x</sub> species | 1238 <sup>14</sup> , 1242 <sup>14</sup>             |
|                                               | 1558 (NH <sub>2</sub> )              | -NH <sub>2</sub> wagging                 | 1531 <sup>16</sup> , 1535, 1543 <sup>17</sup>       |
|                                               | 1638, 1640                           | δ <sub>as</sub> (NH <sub>3</sub> )       | 1639, 1644 <sup>18</sup> , 1620, 1628               |
|                                               | 2212                                 | N-N stretching                           | 2241, 2250, 2268 <sup>17</sup>                      |
| *N <sub>2</sub>                               | 2169, 2334                           |                                          | 2100-2300 <sup>17</sup>                             |

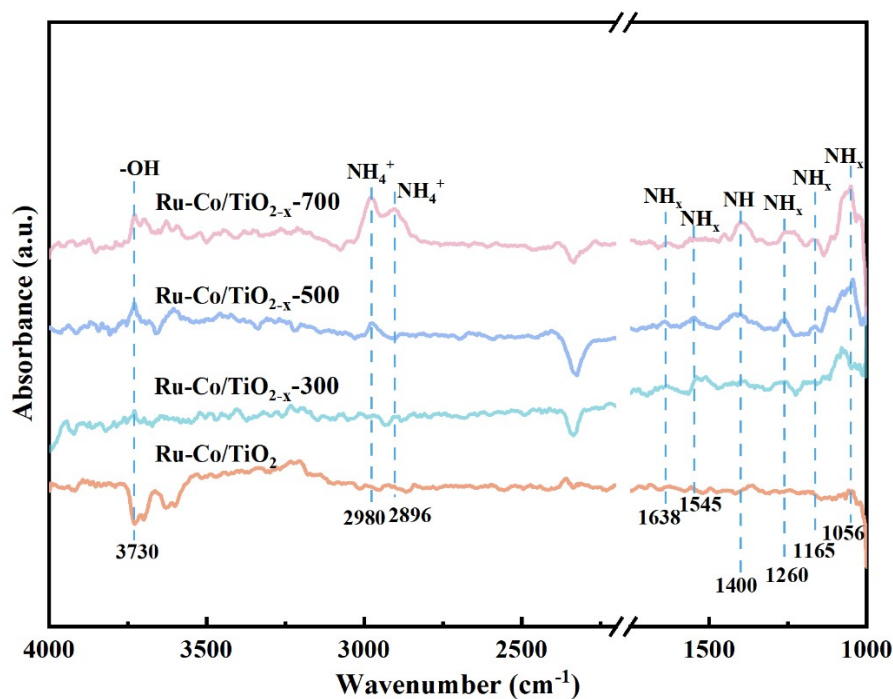

**Fig. S21** In-situ DRIFTS spectra of plasma-catalytic NH<sub>3</sub> synthesis over Ru-Co/TiO<sub>2-x</sub> catalysts. (Discharge time = 6 min)

### 3. Theoretical calculations methods

Density functional theory (DFT) calculations were performed using the Vienna Ab initio Simulation Package (VASP).<sup>19</sup> Electron–ion interactions were described with the projector augmented-wave (PAW) method.<sup>20</sup> The exchange–correlation energy was described using the PBE functional.<sup>21</sup> Dispersion interactions were included using Grimme’s D3 correction.<sup>22</sup> The k-point mesh was generated with a VASPKit k-point density of 0.04 ( $2\pi \text{ \AA}^{-1}$ ).<sup>23</sup> A plane-wave kinetic-energy cutoff of 450 eV was used. Electronic and ionic relaxations were converged to  $1\text{e-}5$  eV and  $-0.02 \text{ eV}\cdot\text{\AA}^{-1}$ , respectively. Spin polarization was included throughout. For slab models, a vacuum region of  $\sim 15 \text{ \AA}$  was introduced along the surface-normal direction. During slab relaxations, the bottom 1 layer was fixed while the remaining atoms were relaxed. On-site Coulomb interactions were treated within the DFT+U framework using the Dudarev approach ( $U_{\text{eff}} = U - J$ ), with  $U_{\text{eff}}$  values of Co: 3.52 eV.<sup>24</sup> Post-processing and data analysis were carried out using VASPKit.<sup>23</sup> Adsorption energies were calculated as  $E_{\text{ads}} = E_{\text{surf+ads}} - E_{\text{surf}} - E_{\text{adsorbate}}$ , where  $E_{\text{surf+ads}}$  is the total energy of the adsorbate–surface system,  $E_{\text{surf}}$  is the clean-surface energy, and  $E_{\text{adsorbate}}$  is the isolated adsorbate energy.

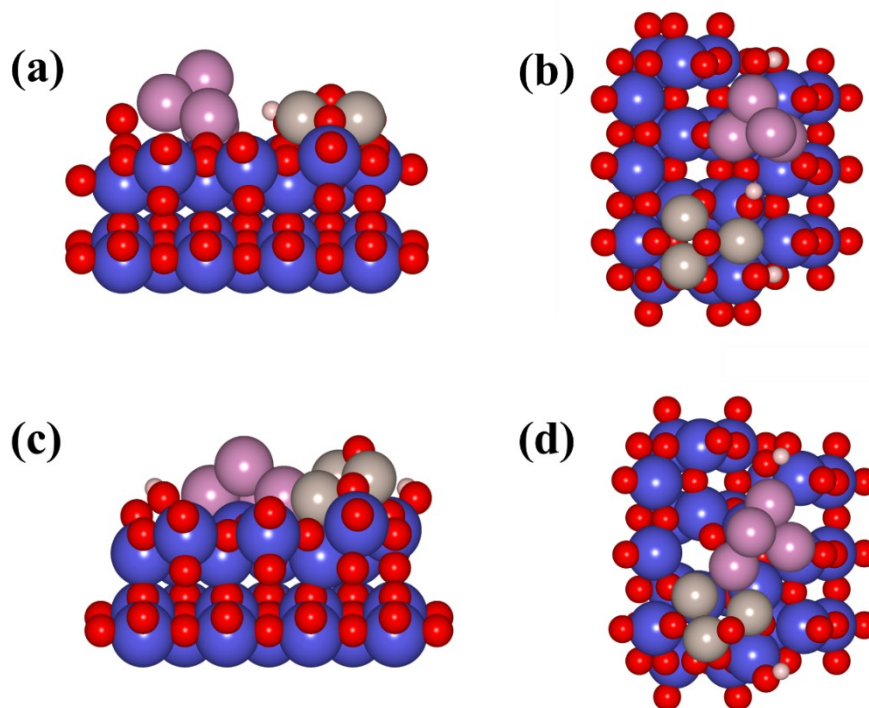

**Fig. S22** Side and top views of Ru-Co/TiO<sub>2</sub> (a and b) and Ru-Co/TiO<sub>2-x</sub>-500 model (c and d) for Bader charge analysis.

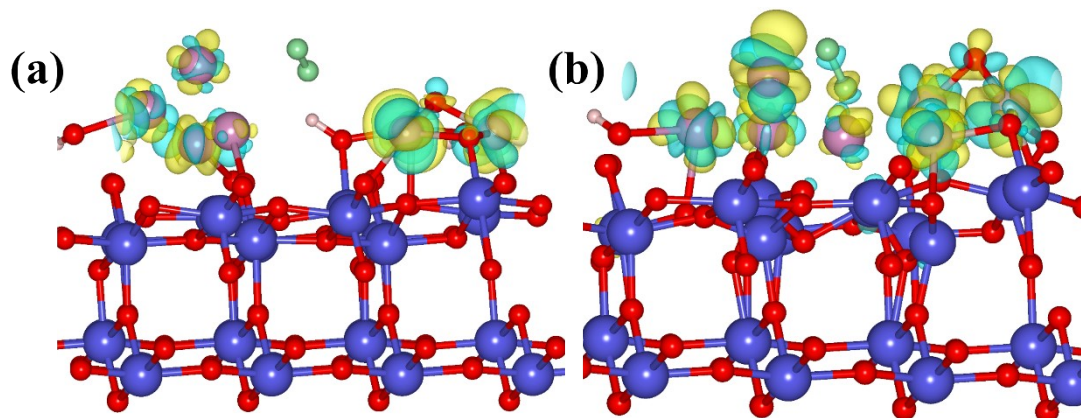

**Fig. S23** The optimized adsorption configurations of N<sub>2</sub> molecules with their corresponding charge distribution on the surface of (a) Ru-Co/TiO<sub>2</sub>, and (b) Ru-Co/TiO<sub>2-x</sub>-500 catalysts.

## References

- (1) Li, S.; Shao, Y.; Chen, H.; Fan, X. Nonthermal Plasma Catalytic Ammonia Synthesis over a Ni Catalyst Supported on MgO/SBA-15. *Ind. Eng. Chem. Res.* **2022**, *61* (9), 3292–3302. <https://doi.org/10.1021/acs.iecr.1c04968>.
- (2) Luo, S.; Liu, Y.; Song, Y.; Yang, Y.; Chen, F.; Chen, S.; Wei, Z. Plasma-Induced Nitrogen Vacancy-Mediated Ammonia Synthesis over a VN Catalyst. *Chem. Commun.* **2024**, *60* (24), 3295–3298. <https://doi.org/10.1039/D4CC00042K>.
- (3) Bajpai, A.; Kumar, S. Tailoring the Surface Acidity of Catalyst to Enhance Nonthermal Plasma-Assisted Ammonia Synthesis Rates. *Mol. Catal.* **2024**, *557*, 113961. <https://doi.org/https://doi.org/10.1016/j.mcat.2024.113961>.
- (4) Nguyen, H. M.; Gorky, F.; Guthrie, S.; Carreon, M. L. Sustainable Ammonia Synthesis from Nitrogen Wet with Sea Water by Single-Step Plasma Catalysis. *Catal. Today* **2023**, *418*, 114141. <https://doi.org/https://doi.org/10.1016/j.cattod.2023.114141>.
- (5) Li, X.; Jiao, Y.; Cui, Y.; Dai, C.; Ren, P.; Song, C.; Ma, X. Synergistic Catalysis of the Synthesis of Ammonia with Co-Based Catalysts and Plasma: From Nanoparticles to a Single Atom. **2021**. <https://doi.org/10.1021/acsami.1c12695>.
- (6) Liu, Y.; Xu, X.; Song, Q.; Guo, Z.; Wu, X.; Chen, C.; Chen, Q.; Zhang, H. Co-Ni/MOF-74 Catalyst Packed-Bed DBD Plasma for Ammonia Synthesis. *Plasma Process. Polym.* **2024**, *21* (2), 2300086. <https://doi.org/https://doi.org/10.1002/ppap.202300086>.
- (7) Li, S.; van Raak, T.; Gallucci, F. Investigating the Operation Parameters for Ammonia Synthesis in Dielectric Barrier Discharge Reactors. *J. Phys. D. Appl. Phys.* **2020**, *53* (1), 014008. <https://doi.org/10.1088/1361-6463/ab4b37>.
- (8) Mizushima, T.; Matsumoto, K.; Sugoh, J.; Ohkita, H.; Kakuta, N. Tubular Membrane-like Catalyst for Reactor with Dielectric-Barrier-Discharge Plasma and Its Performance in Ammonia Synthesis. *Appl. Catal. A Gen.* **2004**, *265* (1), 53–59. <https://doi.org/https://doi.org/10.1016/j.apcata.2004.01.002>.
- (9) Zhang, Y.; Li, S.; Qiu, B.; Chen, S.; Chen, H.; Fan, X. MgAl Layered Double

- Hydroxide (LDH) for Promoting Ammonia Synthesis in Non-Thermal Plasma: Role of Surface Oxygen Vacancy. *Chem. Eng. Process. - Process Intensif.* **2024**, *195*, 109608. <https://doi.org/https://doi.org/10.1016/j.cep.2023.109608>.
- (10) Kim, H.-H.; Teramoto, Y.; Ogata, A.; Takagi, H.; Nanba, T. Atmospheric-Pressure Nonthermal Plasma Synthesis of Ammonia over Ruthenium Catalysts. *Plasma Process. Polym.* **2017**, *14* (6), 1600157. <https://doi.org/https://doi.org/10.1002/ppap.201600157>.
- (11) Gao, B.; Cao, G.; Hu, D.; Guo, L.; Ba, Z.; Li, C.; Zhao, J.; Fang, Y. Insight into the Effect of Support Properties on DBD Plasma-Catalytic NH<sub>3</sub> Synthesis over Ru-Co Bimetallic Catalysts. *Fuel* **2025**, *382*, 133802. <https://doi.org/https://doi.org/10.1016/j.fuel.2024.133802>.
- (12) Ye, B.; Liu, C.; Chen, Y.; Chen, Q.; Jing, K.; Yu, J. C.; Wu, J.; Wu, L. Regulating the Unsaturated Co Sites on MOF-74(Co) for Enhancing Photocatalytic N<sub>2</sub> to NH<sub>3</sub> Conversion. *ACS Sustain. Chem. Eng.* **2025**, *13* (9), 3588–3599. <https://doi.org/10.1021/acssuschemeng.4c09653>.
- (13) Song, S.; Wang, F.; Sun, X.; Chen, Y.; Liu, J.; Shi, Y.; Ning, P.; Ma, Y.; Li, K. Plasma-Assisted Ammonia Synthesis from N<sub>2</sub> and H<sub>2</sub>O over RGO-TiO<sub>2</sub> Catalysts: Enhancing Energy Efficiency and Unraveling Reaction Mechanisms. *ACS Catal.* **2025**, *15* (20), 17603–17613. <https://doi.org/10.1021/acscatal.5c06041>.
- (14) Yuan, J.; Feng, W.; Zhang, Y.; Xiao, J.; Zhang, X.; Wu, Y.; Ni, W.; Huang, H.; Dai, W. Unraveling Synergistic Effect of Defects and Piezoelectric Field in Breakthrough Piezo-Photocatalytic N<sub>2</sub> Reduction. *Adv. Mater.* **2024**, *36* (5), 2303845. <https://doi.org/https://doi.org/10.1002/adma.202303845>.
- (15) Wang, L.; Yi, Y.; Zhao, Y.; Zhang, R.; Zhang, J.; Guo, H. NH<sub>3</sub> Decomposition for H<sub>2</sub> Generation: Effects of Cheap Metals and Supports on Plasma–Catalyst Synergy. *ACS Catal.* **2015**, *5* (7), 4167–4174. <https://doi.org/10.1021/acscatal.5b00728>.
- (16) Lv, L.; Chu, P.; Han, T.; Jiang, Y.; Wang, Z.; Liu, Y.; Dai, H.; Wei, L.; Deng, J. Carbon and Oxygen Double Defects-Enhanced Ru-Based Catalyst for Ammonia

- Decomposition. *Angew. Chemie Int. Ed.* **2025**, *64* (23), e202501898. <https://doi.org/https://doi.org/10.1002/anie.202501898>.
- (17) Winter, L. R.; Ashford, B.; Hong, J.; Murphy, A. B.; Chen, J. G. Identifying Surface Reaction Intermediates in Plasma Catalytic Ammonia Synthesis. *ACS Catal.* **2020**, *10* (24), 14763–14774. <https://doi.org/10.1021/acscatal.0c03166>.
- (18) Wang, Y.; Yang, W.; Xu, S.; Zhao, S.; Chen, G.; Weidenkaff, A.; Hardacre, C.; Fan, X.; Huang, J.; Tu, X. Shielding Protection by Mesoporous Catalysts for Improving Plasma-Catalytic Ambient Ammonia Synthesis. *J. Am. Chem. Soc.* **2022**, *144* (27), 12020–12031. <https://doi.org/10.1021/jacs.2c01950>.
- (19) Hafner, J. Ab-Initio Simulations of Materials Using VASP: Density-Functional Theory and Beyond. *J. Comput. Chem.* **2008**, *29* (13), 2044–2078. <https://doi.org/https://doi.org/10.1002/jcc.21057>.
- (20) Blöchl, P. E. Projector Augmented-Wave Method. *Phys. Rev. B* **1994**, *50* (24), 17953–17979. <https://doi.org/10.1103/PhysRevB.50.17953>.
- (21) Perdew, J. P.; Burke, K.; Ernzerhof, M. Generalized Gradient Approximation Made Simple. *Phys. Rev. Lett.* **1996**, *77* (18), 3865–3868. <https://doi.org/10.1103/PhysRevLett.77.3865>.
- (22) Grimme, S.; Antony, J.; Ehrlich, S.; Krieg, H. A Consistent and Accurate Ab Initio Parametrization of Density Functional Dispersion Correction (DFT-D) for the 94 Elements H-Pu. *J. Chem. Phys.* **2010**, *132* (15), 154104. <https://doi.org/10.1063/1.3382344>.
- (23) Wang, V.; Xu, N.; Liu, J.-C.; Tang, G.; Geng, W.-T. VASPKIT: A User-Friendly Interface Facilitating High-Throughput Computing and Analysis Using VASP Code. *Comput. Phys. Commun.* **2021**, *267*, 108033. <https://doi.org/https://doi.org/10.1016/j.cpc.2021.108033>.
- (24) Dudarev, S. L.; Botton, G. A.; Savrasov, S. Y.; Humphreys, C. J.; Sutton, A. P. Electron-Energy-Loss Spectra and the Structural Stability of Nickel Oxide: An LSDA+U Study. *Phys. Rev. B* **1998**, *57* (3), 1505–1509. <https://doi.org/10.1103/PhysRevB.57.1505>.
